# Supplementary material for: An unprecedented triple helix based on the tetrameric assembly of a macrocycle driven by weak C–H⋯π and C–H⋯O interactions
Source: Royal Society of Chemistry journal article supplement (doi:10.1039/c2ce25549a), 2012-01-01
Supplement: c2ce25549a.pdf [file c2ce25549a.pdf]

## Electronic Supporting Information

# An Unprecedented Triple Helix: Based on A Tetrameric Assembly of Macrocycle driven by weak C–H $\cdots$ $\pi$ and C–H $\cdots$ O Interaction†

Tao Pang,<sup>a</sup> Jie Shang,<sup>b</sup> Qin-Wan Yang,<sup>a</sup> Yu Sun,<sup>a</sup> An-Xin Wu,<sup>\*a</sup> and Hua Jiang<sup>\*b</sup>

<sup>a</sup> Key Laboratory of Pesticide & Chemical Biology, Ministry of Education, Central China Normal University, 152 Luoyu Road, Wuhan 430079, P. R. China Fax: +86 027 67867773; Tel: +86 027 67867773;  
E-mail: [chwuax@mail.cnu.edu.cn](mailto:chwuax@mail.cnu.edu.cn)

<sup>b</sup> Beijing National Laboratory for Molecular Sciences CAS Key Laboratory of Photochemistry Institute of Chemistry, Chinese Academy of Sciences Beijing 100190 (China).  
E-mail: [hjiang@iccas.ac.cn](mailto:hjiang@iccas.ac.cn)

| Table of Contents                                           | Pages |
|-------------------------------------------------------------|-------|
| Experimental procedure for <b>1</b>                         | S2    |
| References                                                  | S2    |
| <sup>1</sup> H and <sup>13</sup> C NMR spectra for <b>1</b> | S3    |
| HRMS of the products <b>1</b>                               | S4    |
| Expanded view of Figure1-4                                  | S5    |
| <sup>1</sup> H NMR Binding Experiments with <b>1</b>        | S12   |

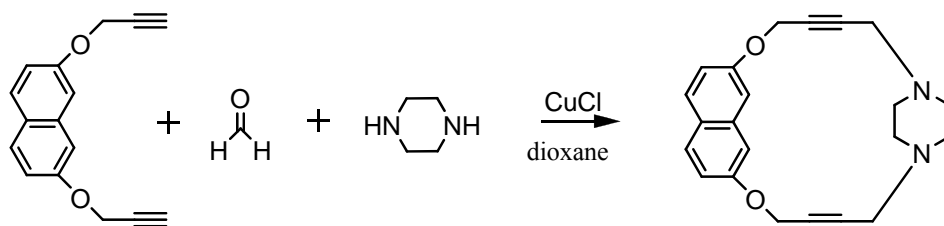

**General experimental procedure for compound 1:**<sup>1</sup> Preparation of products: 1.0 mmol of terminal diyne, 1.0 mmol of secondary diamine and 2.0 mmol of formaldehyde in the presence of 1.0 mmol CuCl in 30 mL of dioxane were heated at 90°C. After workup (monitored by TLC), the solvent was removed under reduced pressure. The solid residue was purified by flash chromatography (SiO<sub>2</sub>, CHCl<sub>3</sub>/CH<sub>3</sub>OH) to give the products **1** (46%) as a white solid. IR (KBr, cm<sup>-1</sup>): 3422, 2944, 2901, 2808, 1625, 1512, 1453, 1203, 1103, 770 cm<sup>-1</sup>. <sup>1</sup>H NMR (600 MHz, CDCl<sub>3</sub>): 7.67(d, J=8.4, 2H), 7.46(d, J=2.4, 2H), 7.02(q, J=2.4, 2H), 4.86(s, 4H), 3.25(s, 4H), 2.50(s, 8H) <sup>13</sup>C NMR (150 MHz, CDCl<sub>3</sub>): 156.0, 135.3, 129.1, 125.0, 117.6, 107.8, 84.3, 80.7, 56.1, 51.4, 46.7. HRMS (ESI): m/z [M + H]<sup>+</sup>calcd for C<sub>22</sub>H<sub>22</sub>N<sub>2</sub>O<sub>2</sub>: 346.17; found:347.1744.

1 A. H. Sharba and K. Charry, *Abhath Al-Yarmouk, Basic Sciences and Engineering*, **2002**, 11(2A), 655.

### $^1\text{H}$ NMR of Compound 1

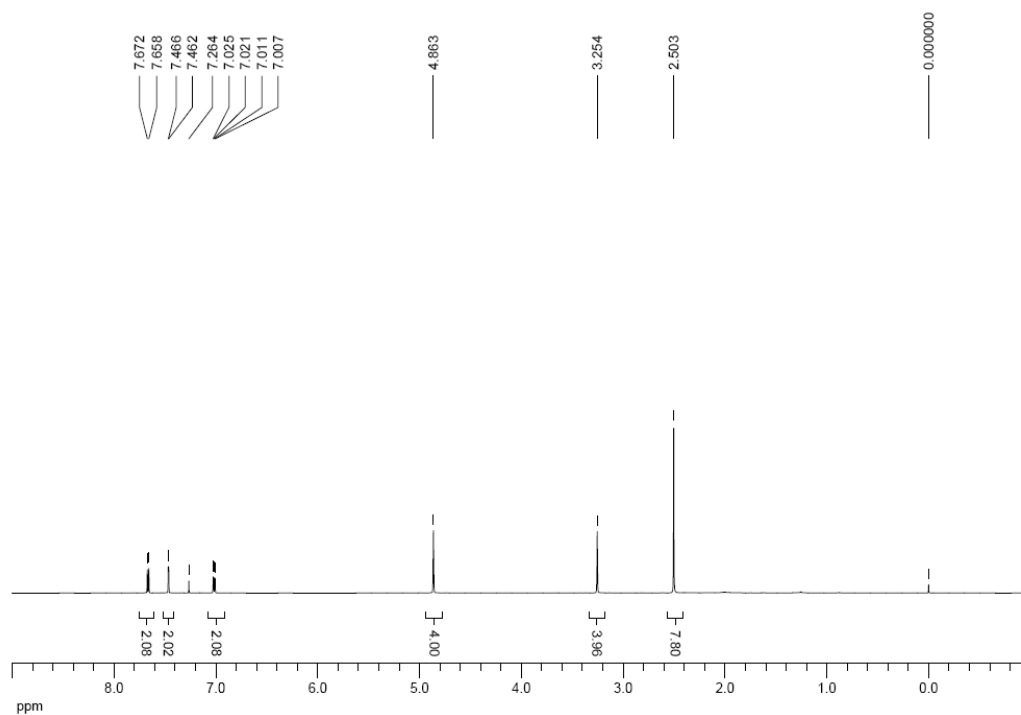

### $^{13}\text{C}$ NMR of Compound 1

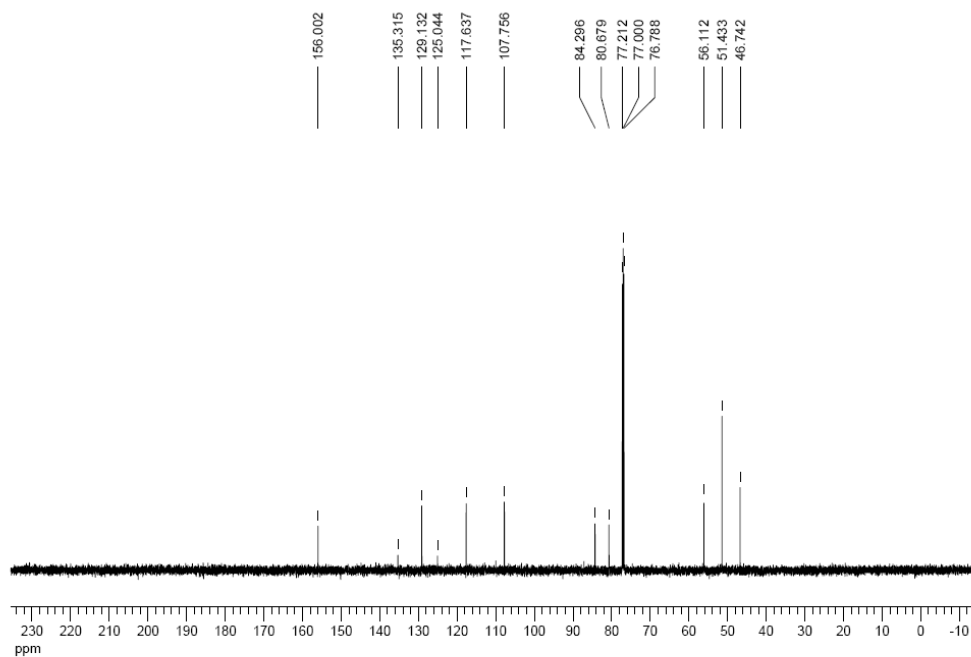

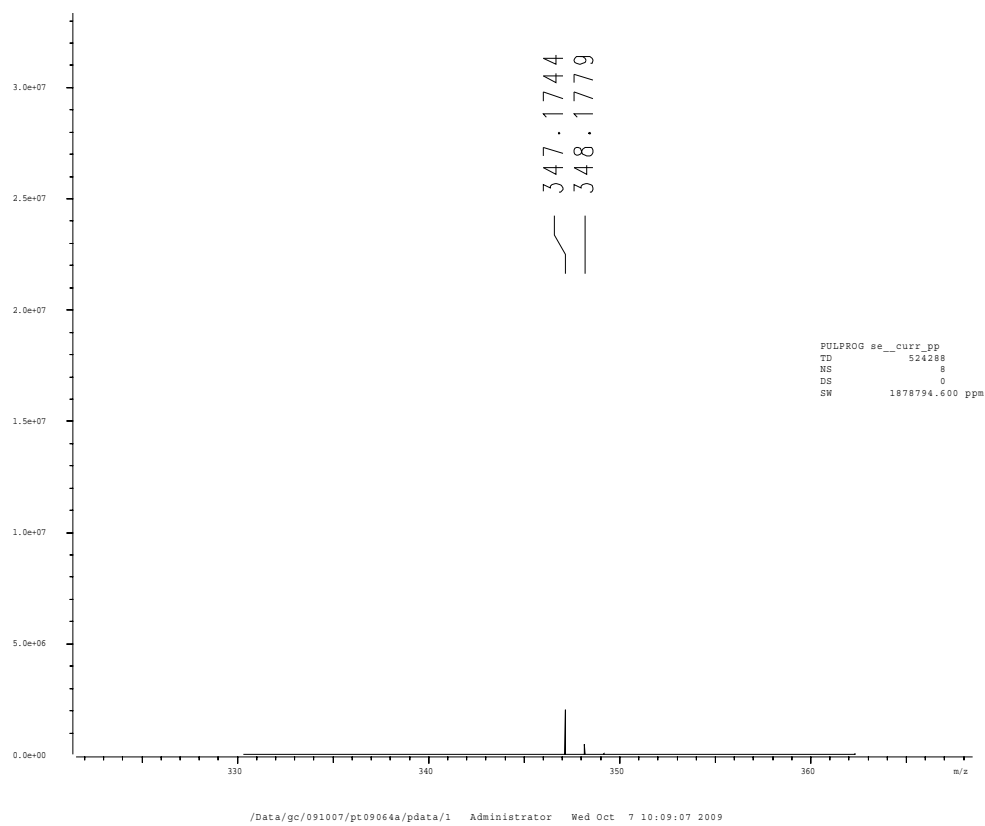

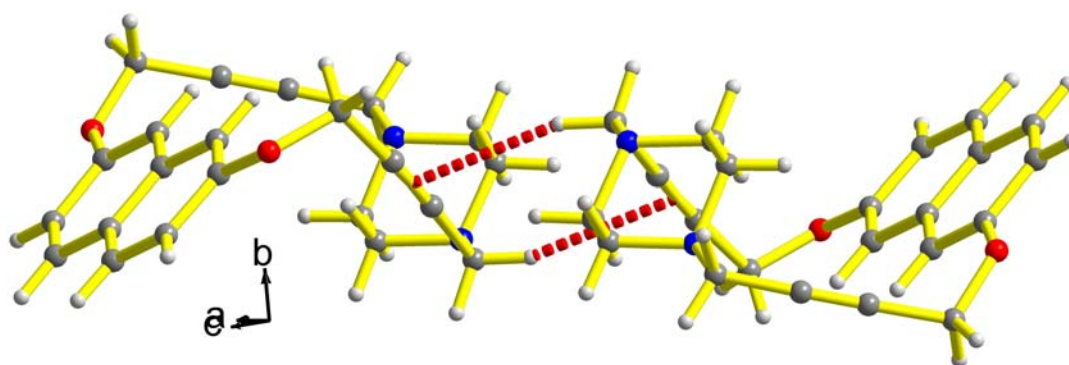

**Figure S1.** Expanded view of Figure 1b. The zigzag motif observed in the x-ray structure of **1**. Color code: C, gray; H, white; N, blue; O, red; C–H... $\pi$  interactions, red striped.

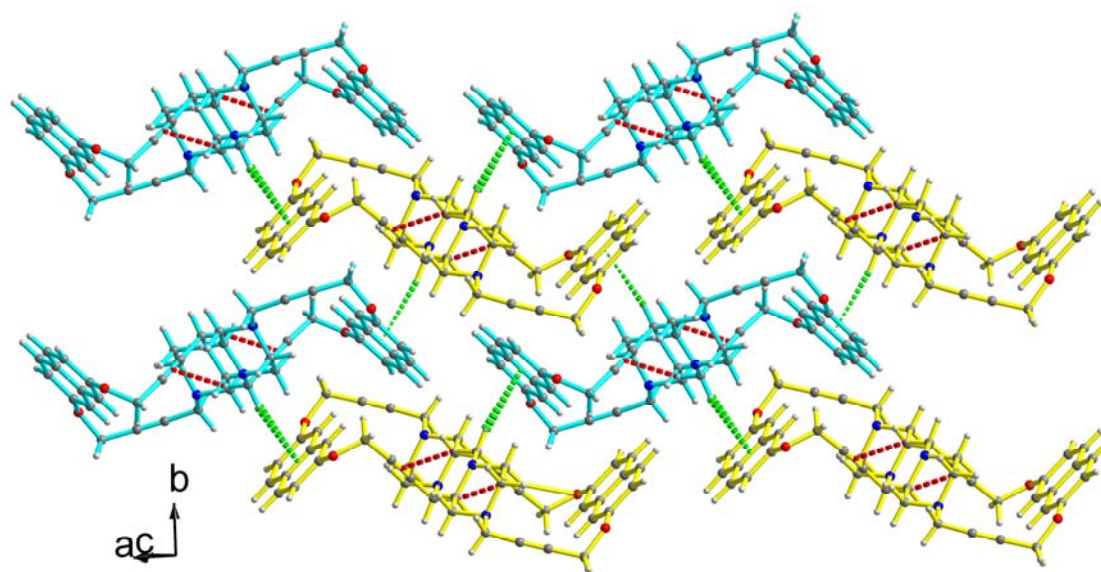

**Figure S2.** Expanded view of Figure 2b.

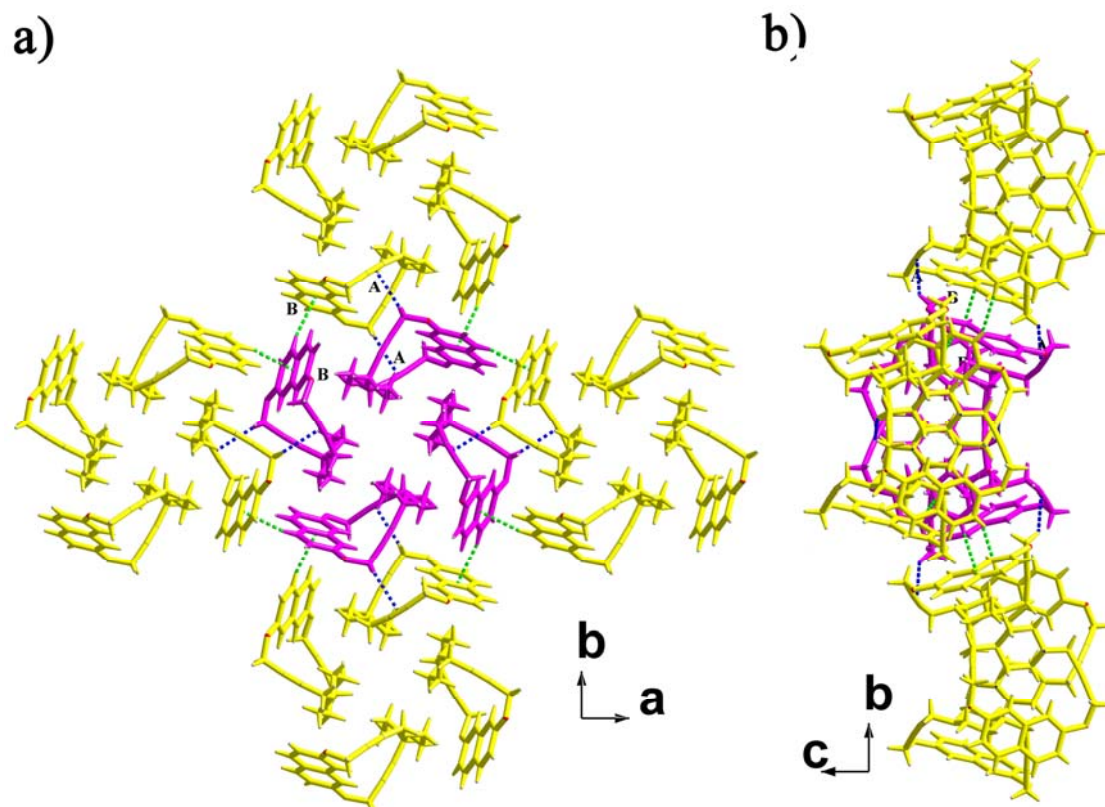

**Figure S3.** Expanded view of Figure 3. (a) Space filling model of the packing of (1)<sub>4</sub> in the crystal of form II. Stacking of (1)<sub>4</sub> viewed down the c-axis. (b) Stacking of (1)<sub>4</sub> viewed down the a-axis.

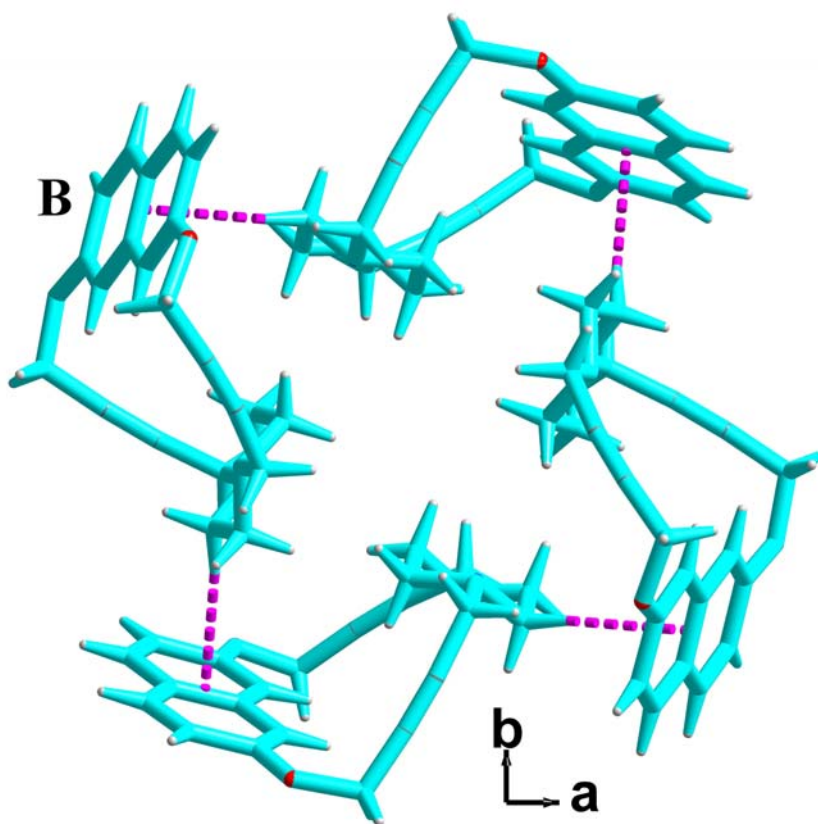

**Figure S4.** Expanded view of Figure 4a. Details of the C–H... $\pi$  interactions in the windmill-shaped structural unit of **1** in form **II** viewed down the c-axis.

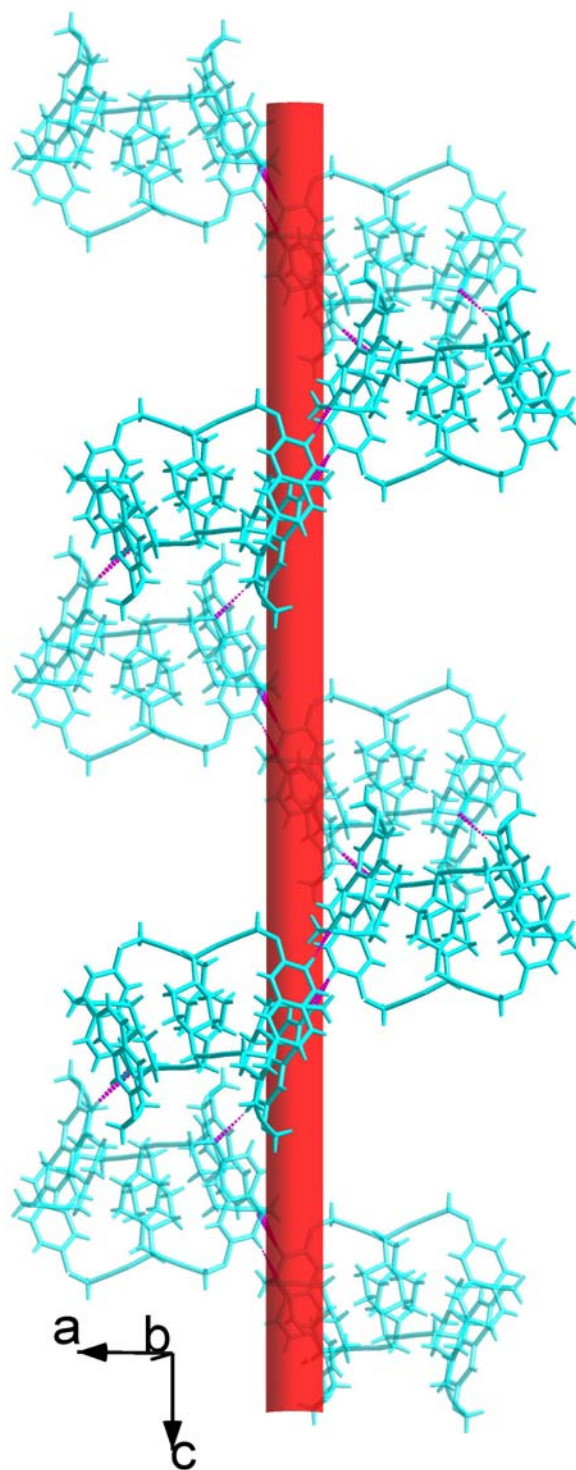

**Figure S5.** Expanded view of Figure 4c. Perspective and space-filling views of the 1D helical structure in form II.



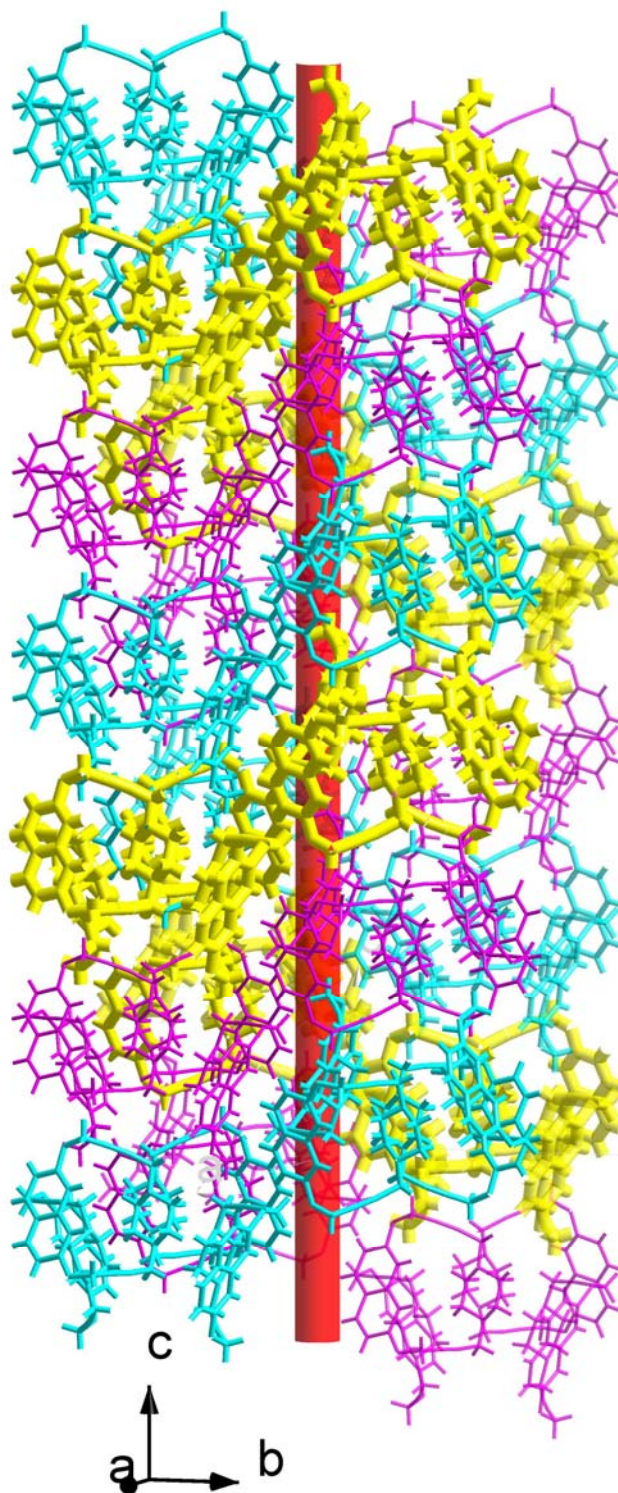

**Figure S6.** Expanded view of Figure 4c. Views of the triple helical 1D braid; each strand of the triple helix is colour coded in yellow, red, and blue.

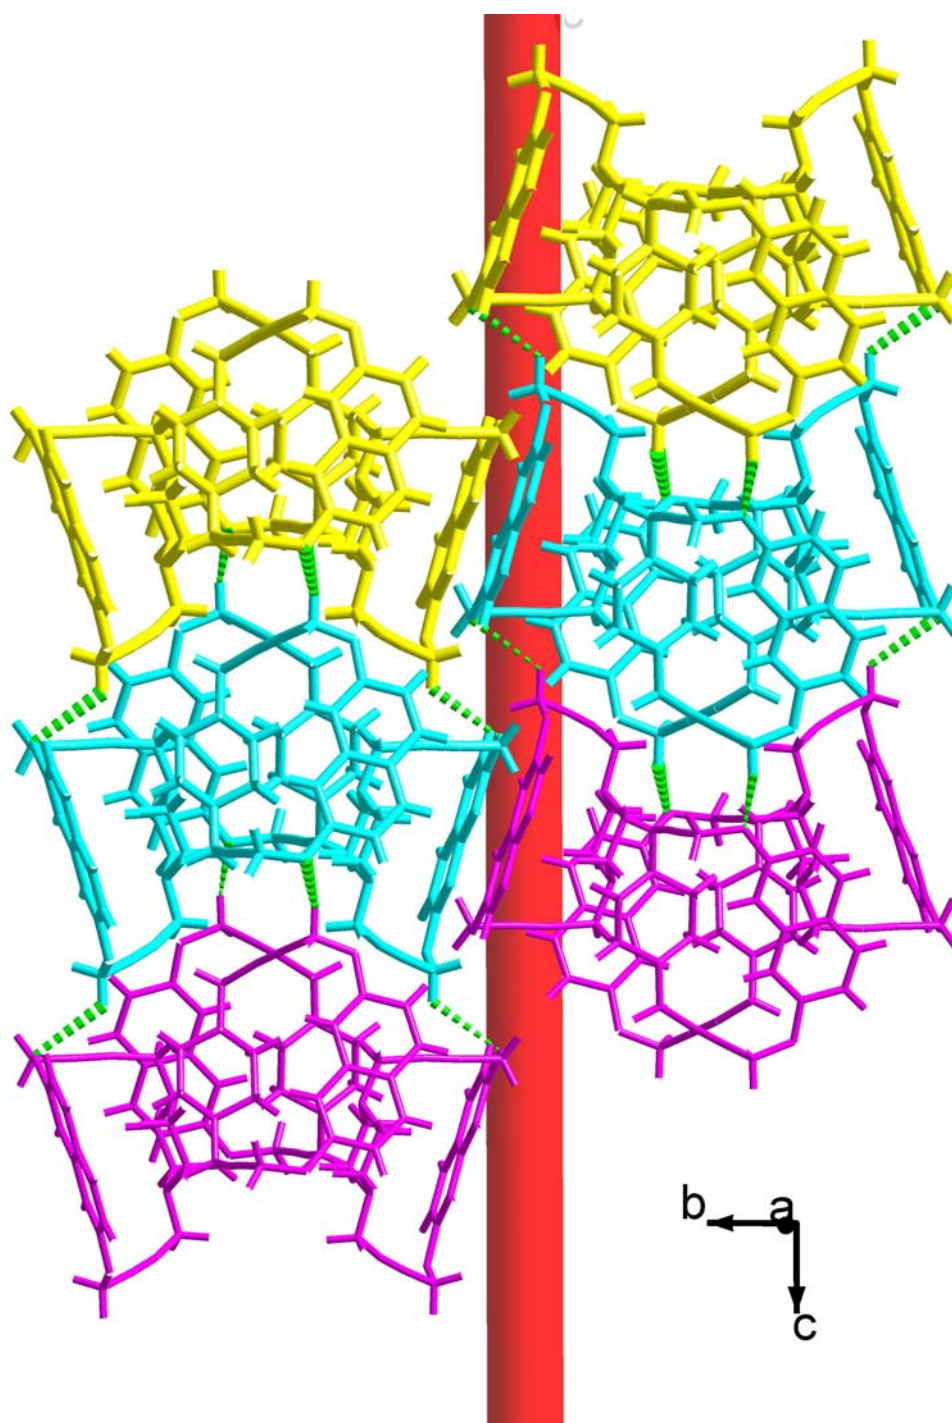

**Figure S7.** Views of the triple helical 1D braid constructed of single helix through strong hydrogen-bonding interactions.

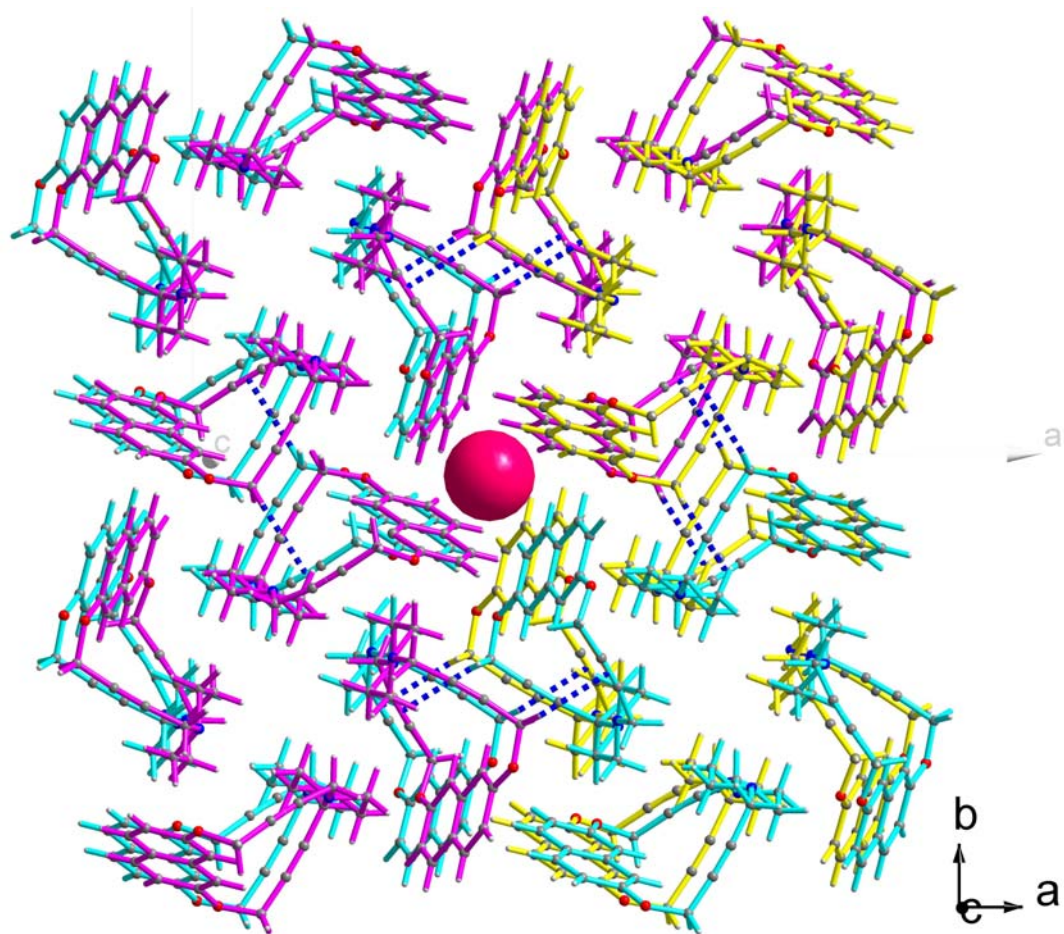

**Figure S8.** Views of the triple helical 1D braid constructed of single helix through complementary C–H $\cdots$  $\pi$  interactions.

### $^1\text{H}$ NMR Binding Experiments with **1**

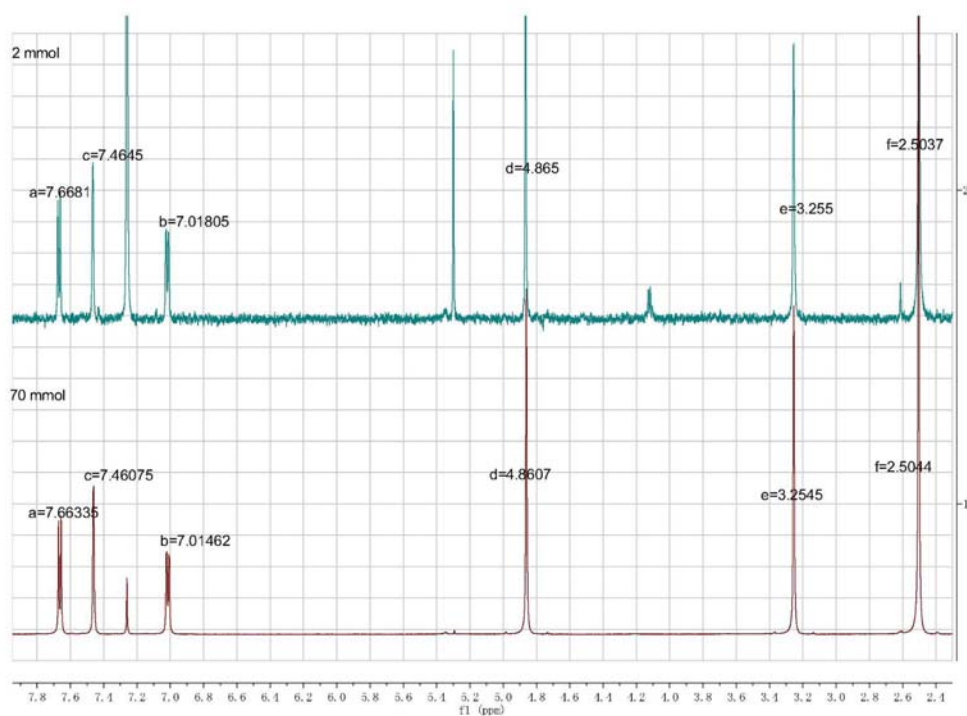

**Figure S9.**  $^1\text{H}$  NMR spectra changes of **1** (600 MHz,  $\text{CDCl}_3$ , 298 K) by variable concentration.

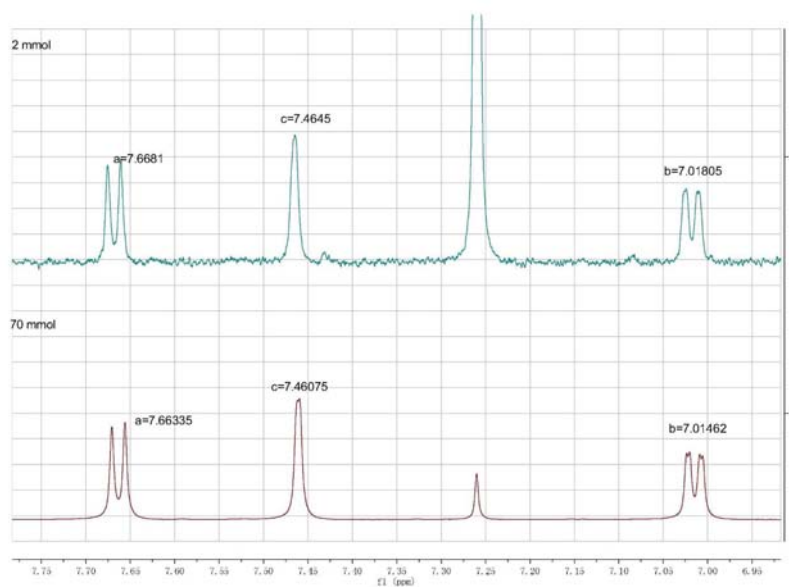

**Figure S10.** Partial  $^1\text{H}$  NMR spectra changes of **1** (600MHz,  $\text{CDCl}_3$ , 298K) in variable concentration.

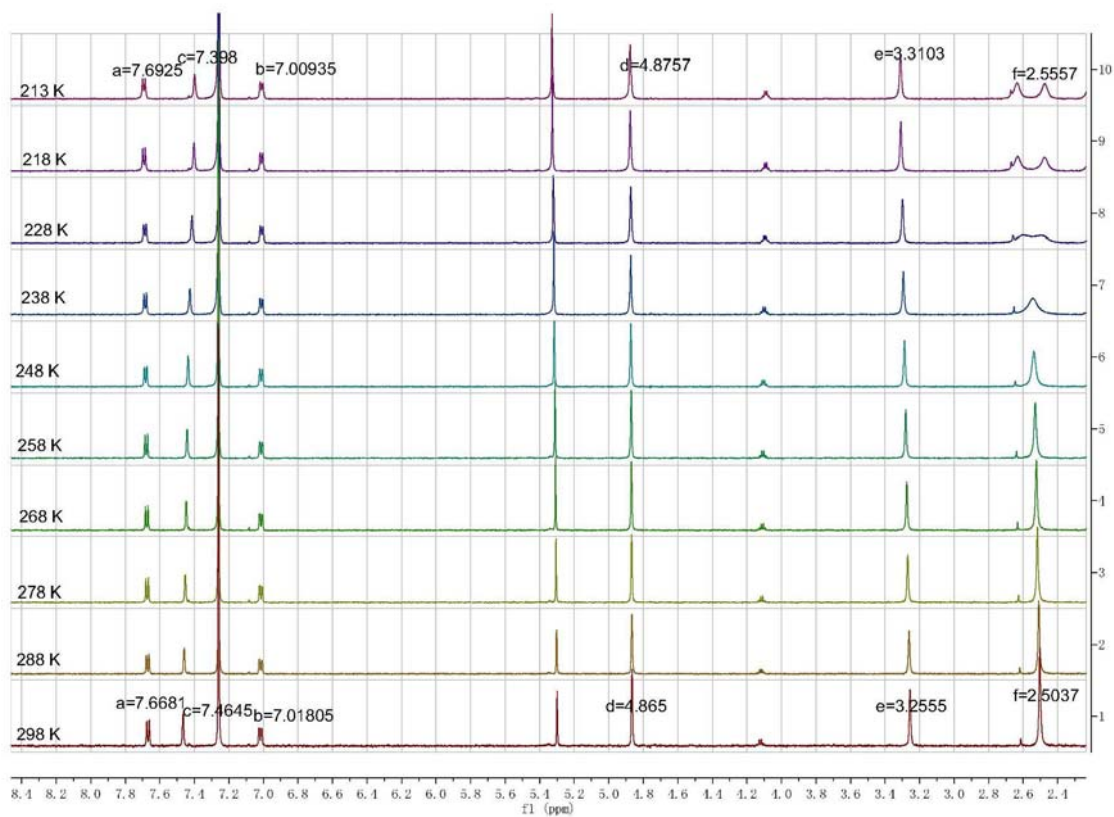

**Figure S11.**  $^1\text{H}$  NMR spectra changes of (600MHz ,  $\text{CDCl}_3$ , 298K) in variable temperature. [**1**] = 2mM.

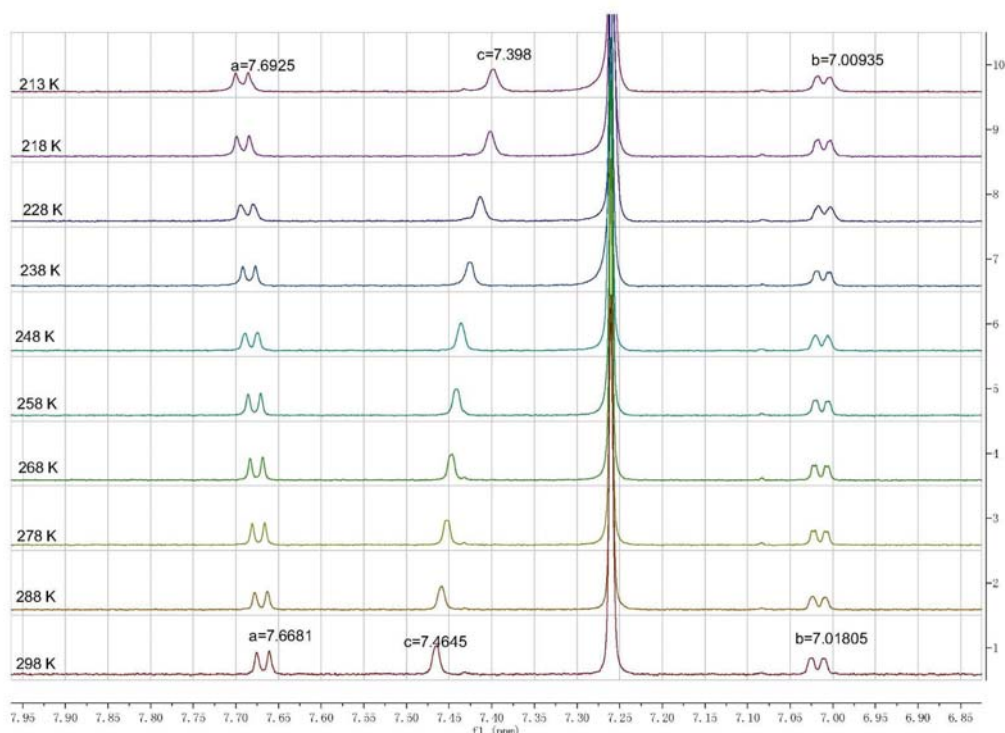

**Figure S12.** Partial  $^1\text{H}$  NMR spectra changes of ( 600MHz,  $\text{CDCl}_3$ , 298 K) in variable temperature. [**1**] = 2mM.

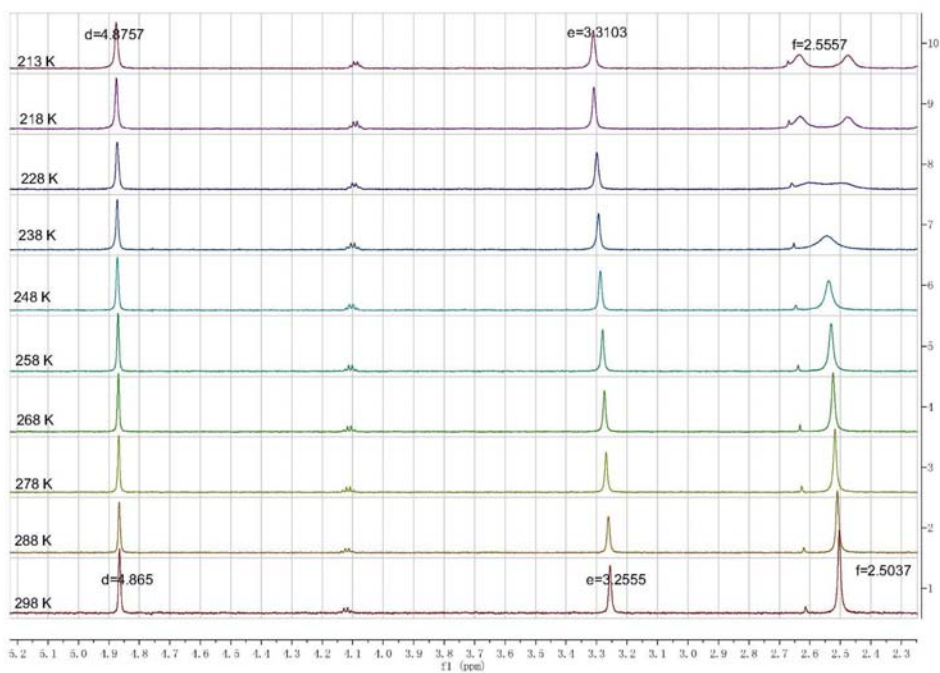

**Figure S13.** Partial  $^1\text{H}$  NMR spectra ( 600MHz,  $\text{CDCl}_3$ , 298 K) in variable temperature.

[1] = 2mM.

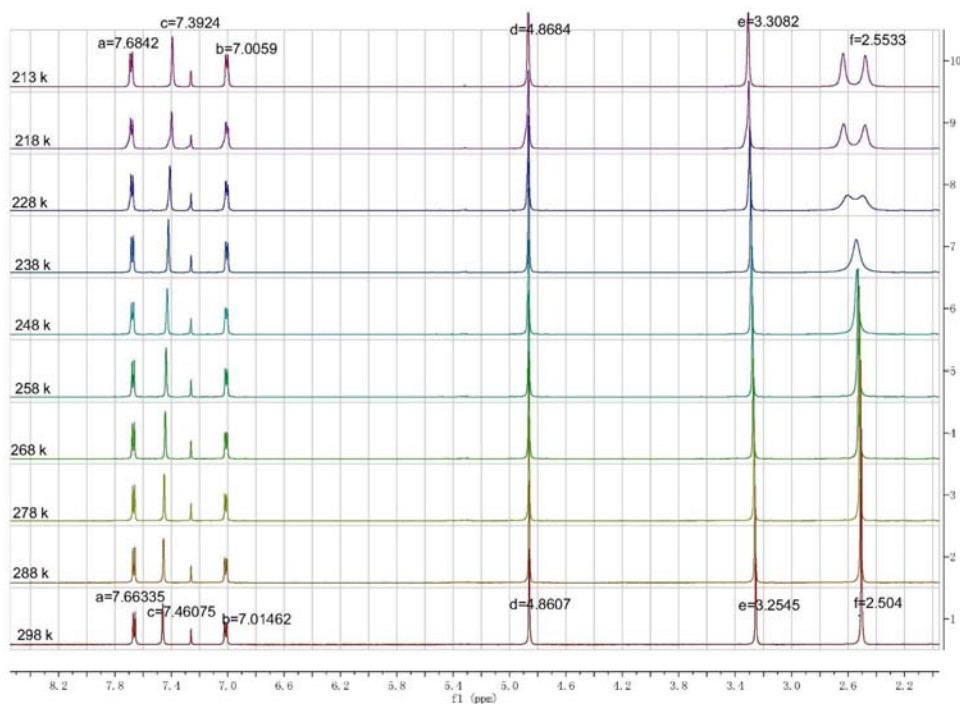

**Figure S14.**  $^1\text{H}$  NMR spectra ( 600MHz,  $\text{CDCl}_3$ , 298 K) in variable temperature. [1] = 70mM.

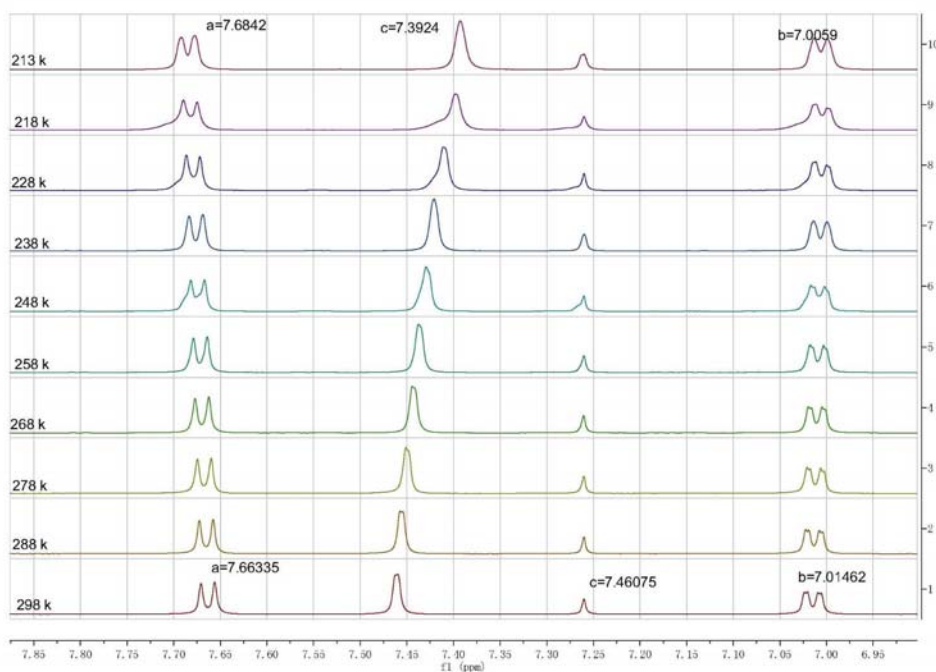

**Figure S15.** Partial  $^1\text{H}$  NMR spectra ( 600MHz,  $\text{CDCl}_3$ , 298 K) in variable temperature. [1] = 70mM.

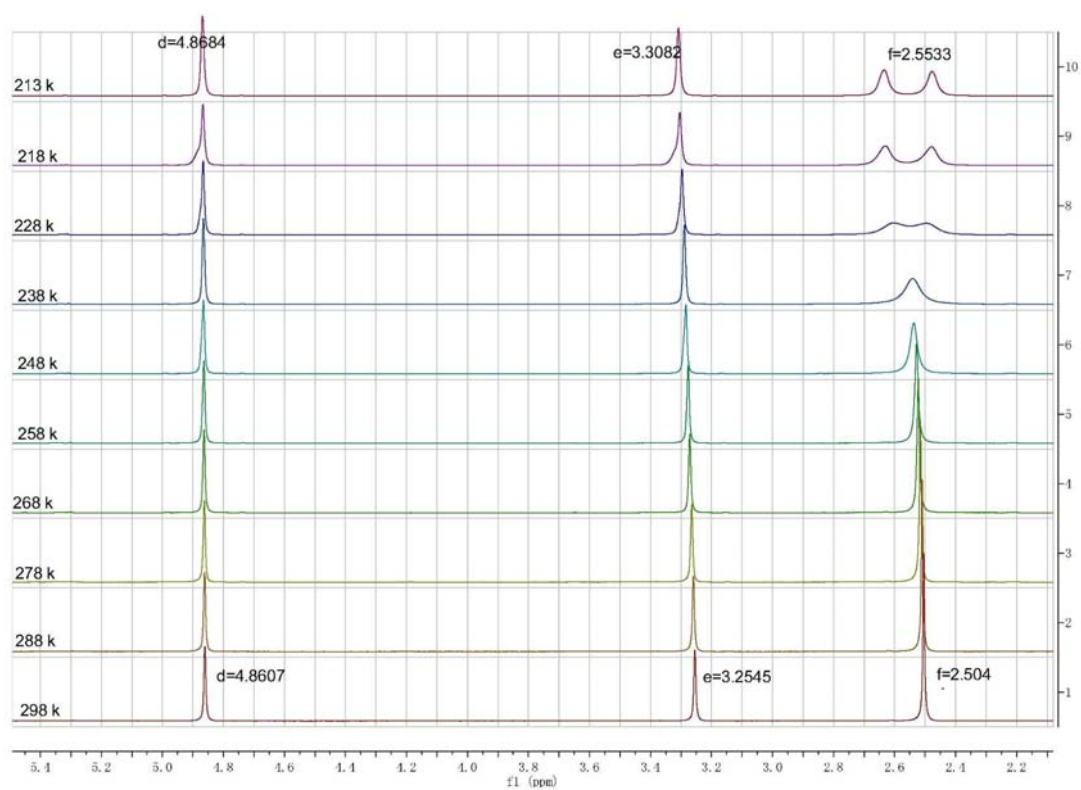

**Figure S16.** Partial  $^1\text{H}$  NMR spectra ( 600MHz,  $\text{CDCl}_3$ , 298 K) in variable temperature.  $[\mathbf{1}] = 70\text{mM}$ .



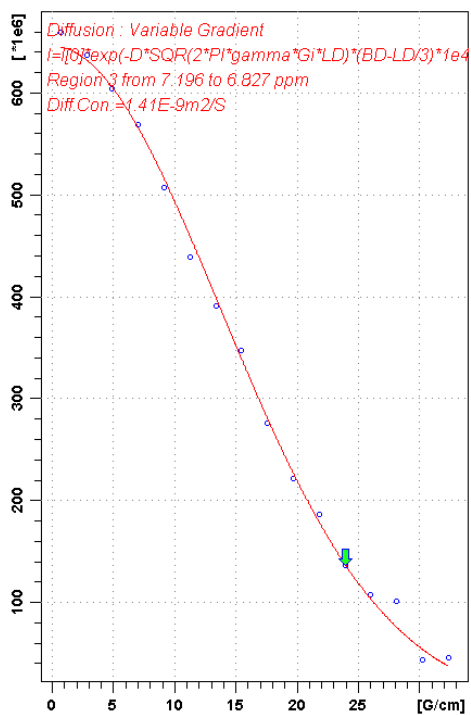

Figure S17. DOSY-2mmol-1-plot,  $D = 14.1 \times 10^{-10} \text{ m}^2/\text{s}$

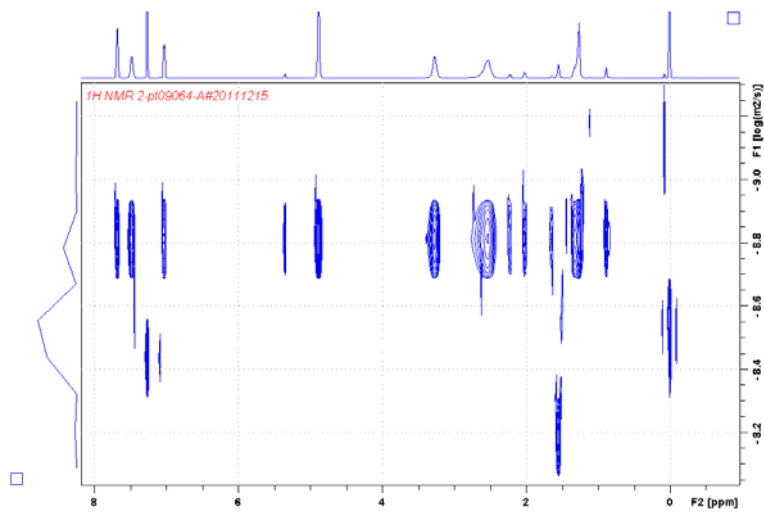

Figure S18. 2DDOSY spectrum ( 600MHz, CDCl<sub>3</sub>, 298 K) of **1**. [1] = 2 mM

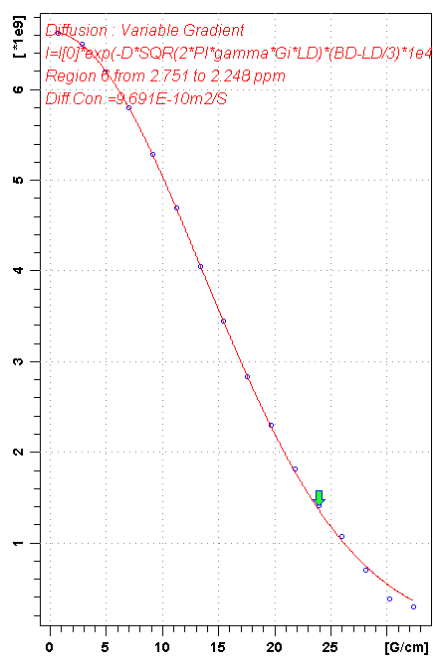

Figure S19. DOSY-70mmol-1-plot,  $D=9.69 \times 10^{-10} \text{ m}^2/\text{s}$

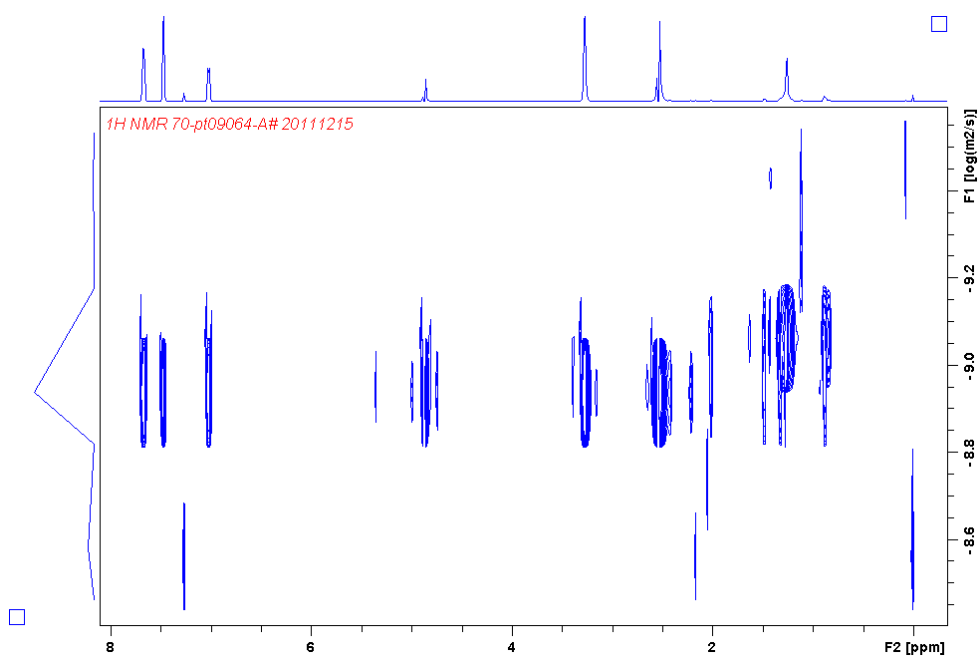

Figure S20. 2DDOSY spectrum ( 600MHz, CDCl<sub>3</sub>, 298 K) of 1. [1] = 70 mM.
